# Supplementary material for: Loss of habenular Prkar2a reduces hedonic eating and increases exercise motivation
Source: PubMed Central journal article supplement (PMC7714411; doi:10.1172/jci.insight.141670), 2020-12-03
Supplement: jciinsight-5-141670-s038.pdf [file jciinsight-5-141670-s038.pdf]

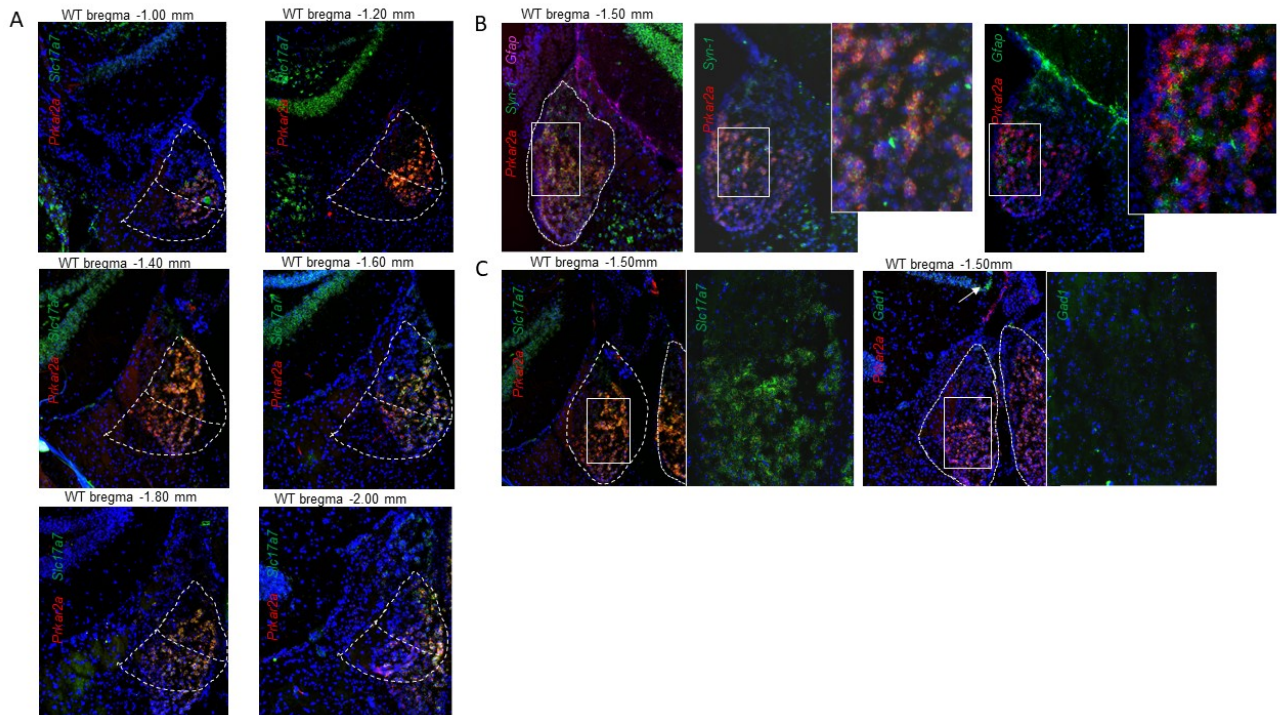

**Supplemental Figure 1.** Characterization of habenular *Prkar2a* expression anterior to posterior in WT C57/BL6 mouse and general MHb cell type categorization. A. Representative ISH mapping images of *Prkar2a* expression in 20 $\mu$ M thick sections spanning the entirety of habenula defined as bregma -0.98 mm—2.06 mm.<sup>54</sup> Sections were also probed for *Slc17a7* as a glutamatergic marker and counterstained with DAPI. B. Representative image of MHb ISH with probes for *Prkar2a* (red), *Syn1* (green), and *Gfap* (purple) showed *Prkar2a* expression in both neurons and glial cells merged (left), *Syn1* (green) and *Prkar2a* (red) only (middle) and *Gfap* (green) and *Prkar2a* (red) only (right), C. ISH using probes for *Slc17a7* and *Gad1* as markers of glutamatergic or GABAergic cells, respectively was performed to confirm general cell type classification of *Prkar2a*-expressing cells in MHb.

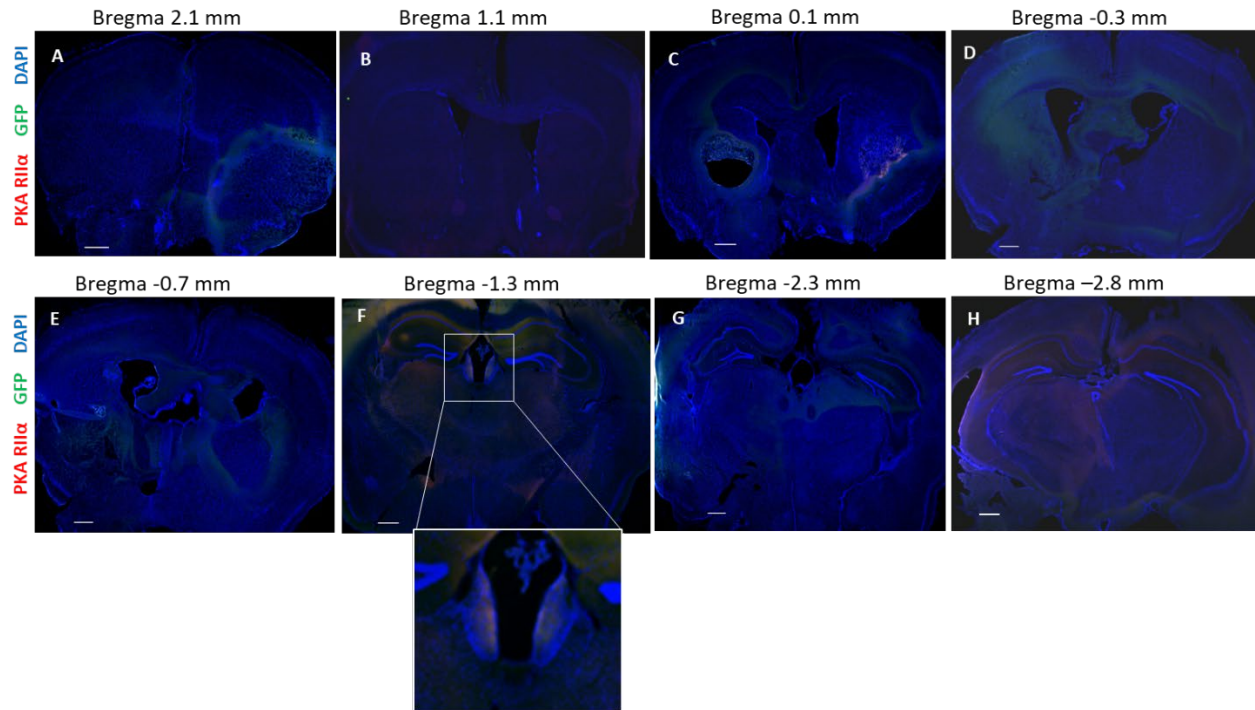

**Supplemental Figure 2.** Representative immunofluorescent images show that re-expression of PKA RII $\alpha$  by bilateral stereotaxic injection of rAAV (pAAV-EF1a-mPrkar2a-IRES-eGFP) was successfully achieved in the MHb. A-E. Coronal sections rostral to the injection target show no expression of PKA RII $\alpha$  or GFP, F. Shows re-expression of PKA RII $\alpha$  (and expression of GFP), and G-H. show two show coronal sections caudal to the injection target. Scale bars represent 500  $\mu$ M.

**Supplemental Table 1.** List of antibodies and conditions used for western blot and immunofluorescence experiments. For western blots, antibodies were diluted in 3% bovine serum albumin in 1X Tris-buffered saline with 0.1% Tween-20. For immunofluorescence of floating and mounted sections, antibodies were diluted in 3% donkey serum in 1X phosphate-buffered saline with 0.1% Triton-X 100 and 0.1% glycine.

| target                          | primary antibody                                                               | dilution | secondary antibody                                                                                         | dilution |
|---------------------------------|--------------------------------------------------------------------------------|----------|------------------------------------------------------------------------------------------------------------|----------|
| <b>western blot</b>             |                                                                                |          |                                                                                                            |          |
| DARPP-32                        | DARPP-32 rabbit monoclonal; Cell Signaling #2302S                              | 1:1000   | AffiniPure Donkey Anti-Rabbit IgG (H+L), HRP-conjugated; Jackson ImmunoResearch Laboratories # 711-035-152 | 1:10,000 |
| DARPP-32 (T <sup>34</sup> )     | DARPP-32 (T34) (D27A4) rabbit monoclonal; Cell Signaling #12438                | 1:800    | AffiniPure Donkey Anti-Rabbit IgG (H+L), HRP-conjugated; Jackson ImmunoResearch Laboratories # 711-035-152 | 1:10,000 |
| DARPP-32 (T <sup>75</sup> )     | DARPP-32 (T75) (D27A4) rabbit monoclonal; Cell Signaling #2301S                | 1:800    | AffiniPure Donkey Anti-Rabbit IgG (H+L), HRP-conjugated; Jackson ImmunoResearch Laboratories # 711-035-152 | 1:10,000 |
| GAPDH                           | (FL-335) rabbit polyclonal; Santa Cruz # sc-25778                              | 1:1100   | AffiniPure Donkey Anti-Rabbit IgG (H+L), HRP-conjugated; Jackson ImmunoResearch Laboratories # 711-035-152 | 1:10,000 |
| Histone 3                       | Histone 3, loading control and CHIP grade, mouse monoclonal; Abcam # ab1791    | 1:2000   | AffiniPure Donkey Anti-Mouse IgG (H+L), HRP-conjugated; Jackson ImmunoResearch Laboratories # 711-035-150  | 1:10,000 |
| HPRT                            | HPRT (F-1) mouse monoclonal; Santa Cruz # sc-376938                            | 1:1200   | AffiniPure Donkey Anti-Mouse IgG (H+L), HRP-conjugated; Jackson ImmunoResearch Laboratories # 711-035-150  | 1:10,000 |
| PKA RI $\alpha$                 | PKA RI $\alpha$ , mouse monoclonal; BD Biosciences # 610610                    | 1:500    | AffiniPure Donkey Anti-Mouse IgG (H+L), HRP-conjugated; Jackson ImmunoResearch Laboratories # 711-035-150  | 1:10,000 |
| PKA C $\alpha$                  | PKA C $\alpha$ rabbit polyclonal; Santa Cruz #sc-903                           | 1:1000   | AffiniPure Donkey Anti-Rabbit IgG (H+L), HRP-conjugated; Jackson ImmunoResearch Laboratories # 711-035-152 | 1:10,000 |
| PKA C $\alpha$ $\beta$ $\gamma$ | PKA C $\alpha$ $\beta$ $\gamma$ (H-95) rabbit polyclonal; Santa Cruz #sc-28892 | 1:1000   | AffiniPure Donkey Anti-Rabbit IgG (H+L), HRP-conjugated; Jackson ImmunoResearch Laboratories # 711-035-152 | 1:10,000 |

**immunofluorescence**

|                                 |                                                                                |                                          |                                                                                                                |                                          |
|---------------------------------|--------------------------------------------------------------------------------|------------------------------------------|----------------------------------------------------------------------------------------------------------------|------------------------------------------|
| c-Fos                           | c-Fos (4) X rabbit polyclonal; Santa Cruz # sc-52X                             | floating,<br>1:300                       | Donkey anti-Rabbit IgG (H+L), Alexa Fluor 555; Invitrogen # A-31572                                            | 1:400                                    |
| c-Jun                           | c-Jun (N) X rabbit polyclonal; Santa Cruz # sc-45 X                            | floating,<br>1:300                       | Donkey anti-Rabbit IgG (H+L), Alexa Fluor 555; Invitrogen # A-31572                                            | 1:400                                    |
| DARPP-32                        | DARPP-32 rabbit monoclonal; Cell Signaling #2302S                              | mounted,<br>1:500                        | Donkey anti-Rabbit IgG (H+L), Alexa Fluor 555; Invitrogen # A-31572                                            | 1: 500                                   |
| GFP                             | GFP (B-2) mouse monoclonal; Santa Cruz, sc-9996                                | floating,<br>1:350;<br>mounted,<br>1:400 | Donkey anti-Mouse IgG (H+L) Highly Cross-Adsorbed Secondary Antibody, Alexa Fluor Plus 48; Invitrogen # A32766 | floating,<br>1:400;<br>mounted<br>1:500  |
| MAP2                            | MAP-2 (AP20) mouse monoclonal; Santa Cruz # sc-32791                           | mounted,<br>1:400                        | Donkey anti-Rabbit IgG (H+L), Alexa Fluor 555; Invitrogen # A-31572                                            | 1:400                                    |
| PKA RII $\alpha$                | PKA RII $\alpha$ reg (M-20) rabbit polyclonal; Santa Cruz # sc-909             | floating,<br>1:400;<br>mounted,<br>1:450 | Donkey anti-Rabbit IgG (H+L), Alexa Fluor 647; Invitrogen # A32795                                             | floating,<br>1:400;<br>mounted,<br>1:500 |
| PKA C $\alpha$                  | PKA C $\alpha$ rabbit polyclonal; Santa Cruz #sc-903                           | floating,<br>1:400;<br>mounted,<br>1:450 | Donkey anti-Rabbit IgG (H+L), Alexa Fluor 647; Invitrogen # A32795                                             | floating,<br>1:400;<br>mounted,<br>1:500 |
| PKA C $\alpha$ $\beta$ $\gamma$ | PKA C $\alpha$ $\beta$ $\gamma$ (H-95) rabbit polyclonal; Santa Cruz #sc-28892 | floating,<br>1:400;<br>mounted,<br>1:450 | Donkey anti-Rabbit IgG (H+L), Alexa Fluor 647; Invitrogen # A32795                                             | floating,<br>1:400;<br>mounted,<br>1:500 |

<sup>a</sup> Blocking buffer used was 5% bovine serum albumin in 1X Tris-buffered saline with 0.1% Tween-20 (1X TBST). All other membranes, 5% nonfat milk was used in 1X TBST.

**Supplemental Table 2.** List of probes and dilution used for *in situ* hybridization experiments. The ACD Biotechne RNAscope Fluorescent Multiplex Assay was used after optimization for fresh frozen brain sections.

| target                              | probe name, catalog #                     | dilution |
|-------------------------------------|-------------------------------------------|----------|
| <b><i>In situ</i> hybridization</b> |                                           |          |
| <i>Chat</i>                         | RNAscope® Probe- Mm-Chat-C2, 408731-C2    | 1:50     |
| <i>Prkar2a</i>                      | RNAscope® Probe- Mm-Prkar2a, 472011       | 1:1      |
|                                     | RNAscope® Probe- Mm-Prkar2a-C3, 472011-C3 | 1:45     |
| <i>Slc17a7</i>                      | RNAscope® Probe- Mm-Slc17a7-C2, 416631-C2 | 1:50     |
| <i>Tac1</i>                         | RNAscope® Probe- Mm-Tac1-C2, 410351-C2    | 1:50     |
| <i>Tacr1</i>                        | RNAscope® Probe- Mm-Tacr1-C3, 428781-C3   | 1:50     |
| <i>Tac2</i>                         | RNAscope® Probe- Mm-Tac2-C2, 446391-C2    | 1:50     |
